# Supplementary material for: FeCl3intercalated few-layer graphene for high lithium-ion storage performance
Source: Royal Society of Chemistry journal article supplement (doi:10.1039/c5ta03087k), 2015-01-01
Supplement: c5ta03087k1.pdf [file c5ta03087k1.pdf]

# FeCl<sub>3</sub> Intercalated Few-Layer Graphene for High Lithium-Ion Storage Performance

Xin Qi, Jin Qu, Hao-Bin Zhang\*, Dongzhi Yang, Yunhua Yu, Cheng Chi and Zhong-Zhen Yu\*

State Key Laboratory of Organic-Inorganic Composites, College of Materials Science and  
Engineering, Beijing University of Chemical Technology, Beijing 100029, China

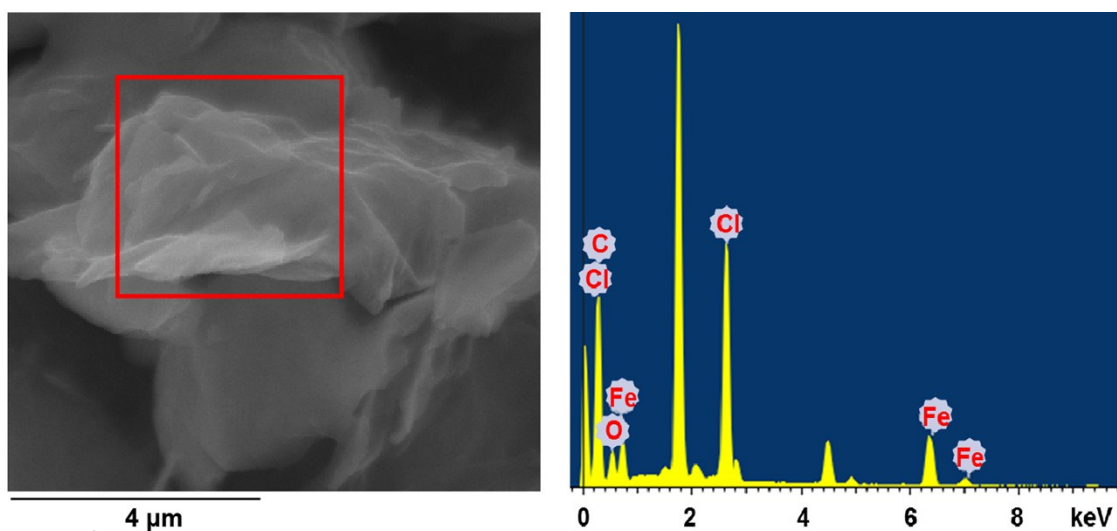

**Figure S1.** Elemental analysis of FeCl<sub>3</sub>-FLG

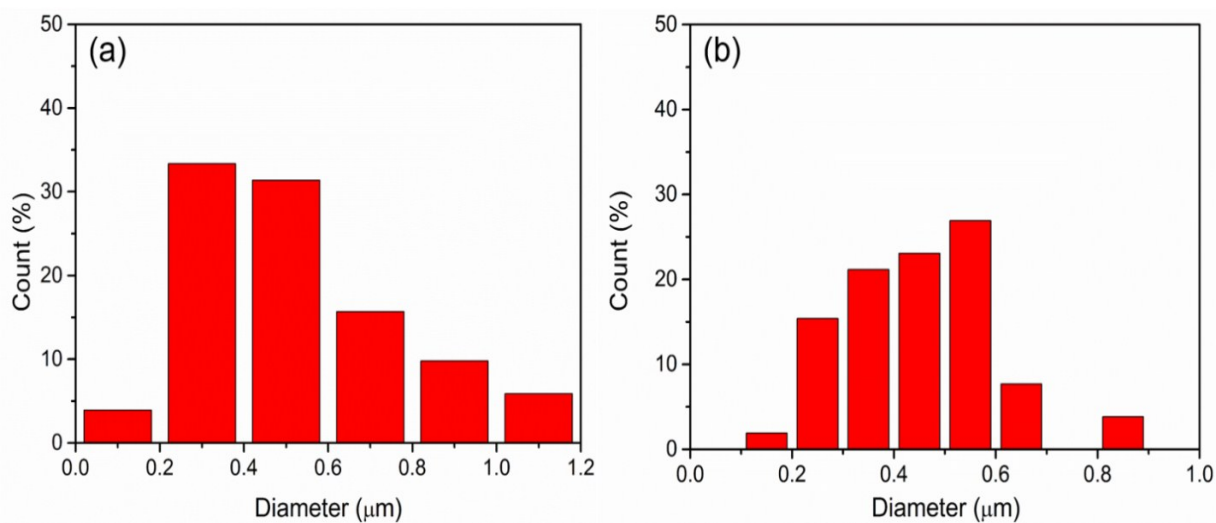

**Figure S2.** Average sizes of (a) sonicated graphite and (b) graphene sheets exfoliated from GICs.

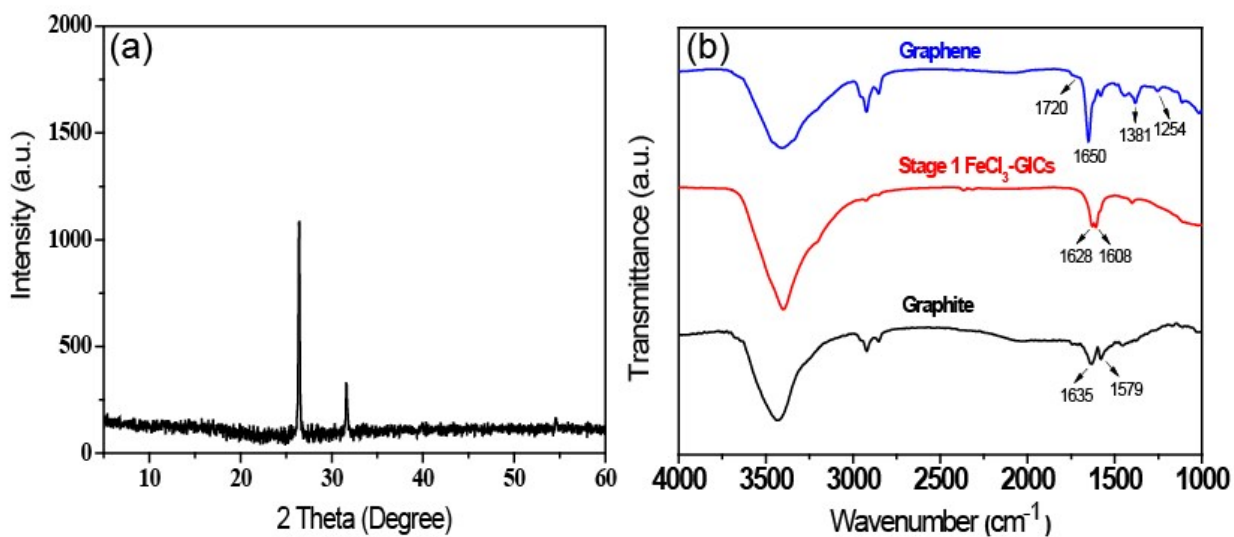

**Figure S3.** (a) XRD pattern of sonicated graphite; (b) FT-IR spectra of graphite, stage 1 FeCl<sub>3</sub>-GICs, and graphene exfoliated from GIC.

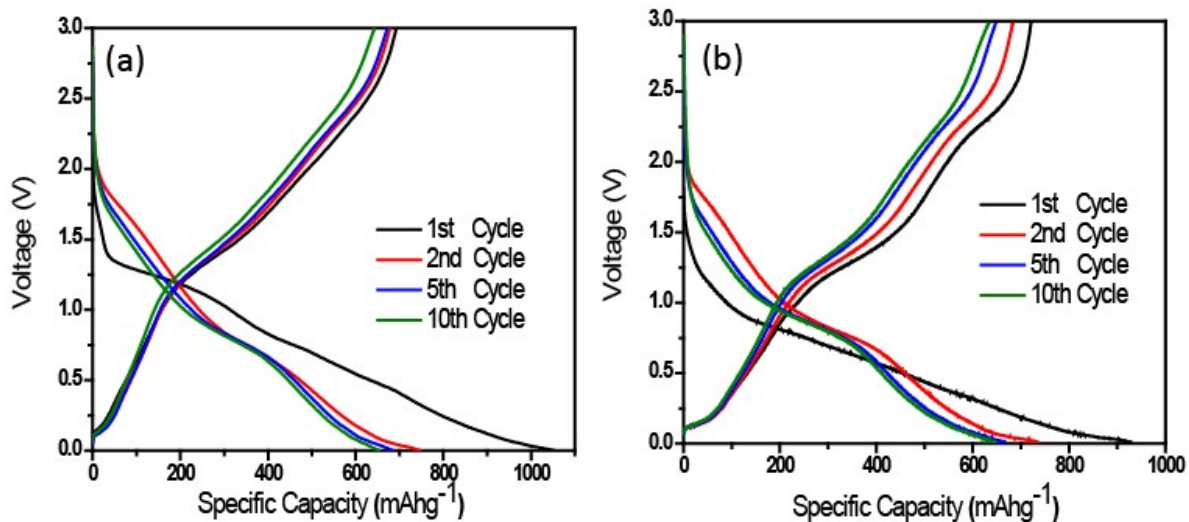

**Figure S4.** Charge/discharge curves of (a) stage 1  $\text{FeCl}_3$ -GICs, and (b) graphene sheets between voltage limits of 0.01-3 V at a current of  $100 \text{ mA g}^{-1}$ .

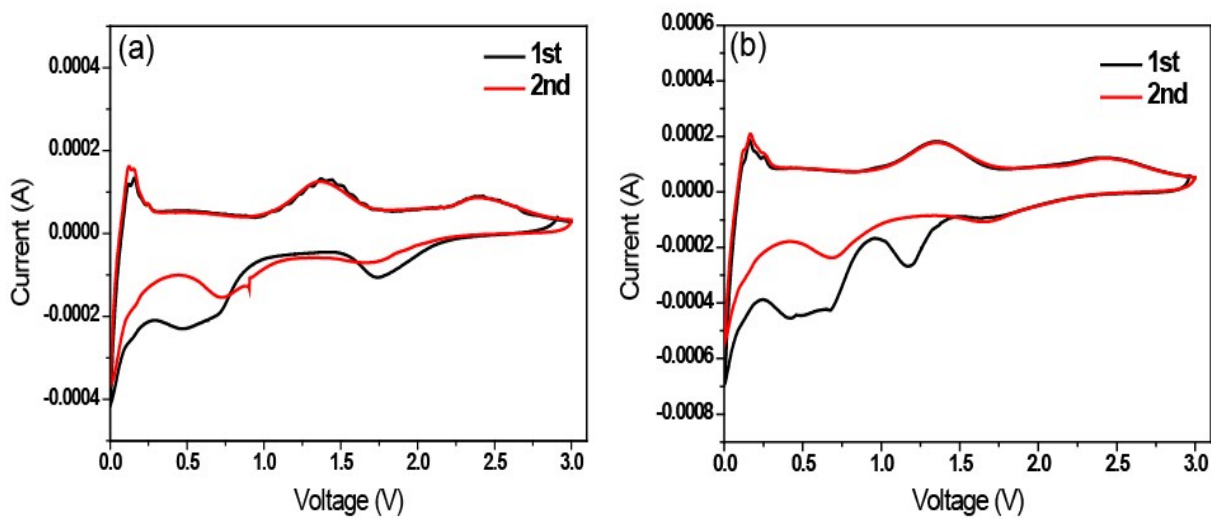

**Figure S5.** Cyclic voltammogram curves of (a)  $\text{FeCl}_3$ -FLG and (b) graphene sheets.

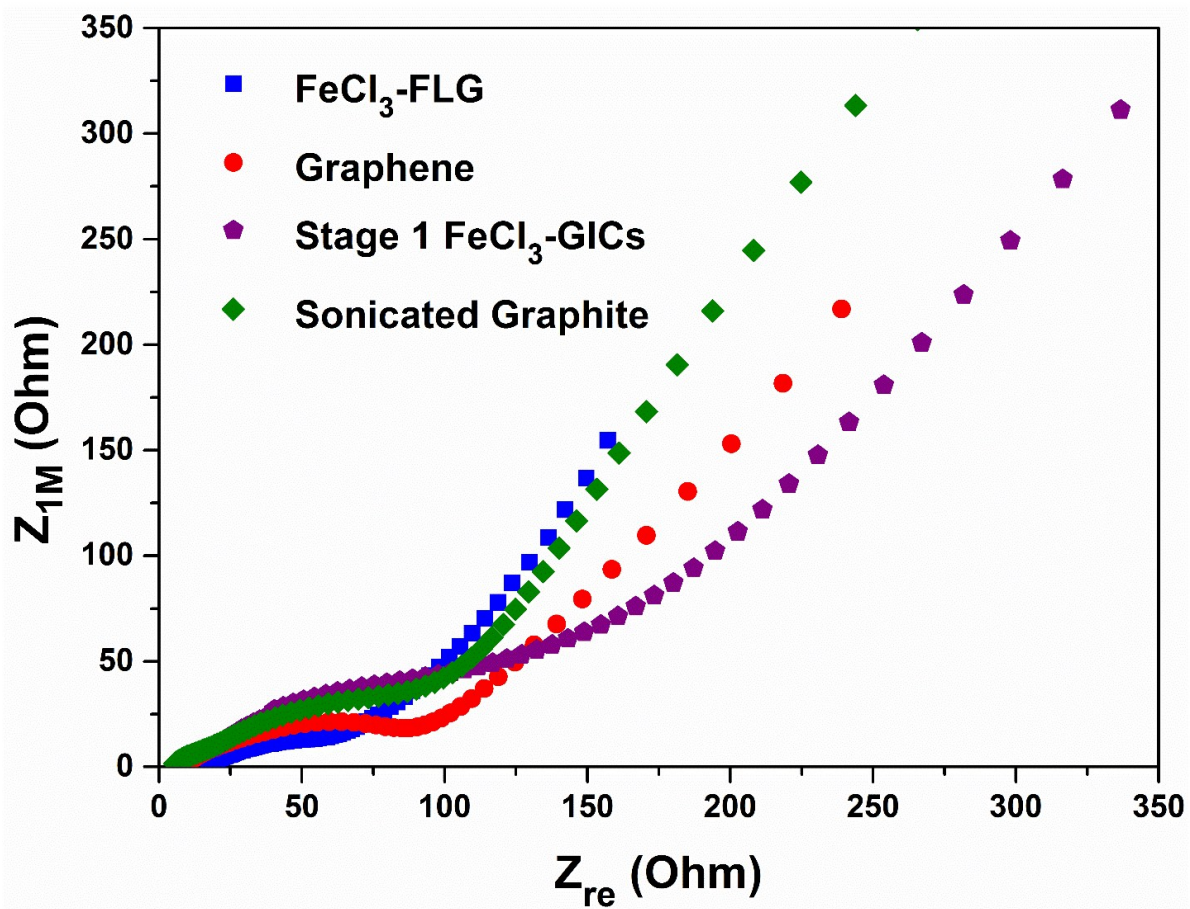

**Figure S6.** AC impedances of the electrodes composed of sonicated graphite, stage 1 FeCl<sub>3</sub>-GICs, graphene, and FeCl<sub>3</sub>-FLG.
